# 1 ViViEchoformer: Deep Video Regressor Predicting Ejection Fraction

2 Taymaz Akan<sup>1</sup>, Sait Alp<sup>2</sup>, Md. Shenuarin Bhuiyan<sup>3</sup>, Tarek Helmy<sup>1</sup>, A. Wayne Orr<sup>3,4</sup>, Md. Mostafizur  
3 Rahman Bhuiyan<sup>5</sup>, Steven A. Conrad<sup>1</sup>, John A. Vanchiere<sup>1,6</sup>, Christopher G. Kevil<sup>3,4</sup>, Mohammad A. N  
4 Bhuiyan<sup>1\*</sup>

5 <sup>1</sup>Department of Medicine, Louisiana State University Health Sciences Center at Shreveport, Shreveport, LA 71103, USA; <sup>2</sup>  
6 Department of Computer Engineering, Erzurum Technical University, Erzurum, Turkey; <sup>3</sup>Department of Pathology and Translational  
7 Pathobiology, Louisiana State University Health Sciences Center at Shreveport, Shreveport, LA 71103, USA; <sup>4</sup>Department of  
8 Molecular and Cellular Physiology, Louisiana State University Health Sciences Center at Shreveport, Shreveport, LA 71103, USA;  
9 <sup>5</sup>Department of Pediatric Cardiology, Bangabandhu Sheikh Mujib Medical University, Bangladesh, <sup>6</sup>Department of Pediatrics,  
10 Louisiana State University Health Sciences Center at Shreveport, Shreveport, LA 71103, USA;

11 Correspondence: Mohammad Alfrad Nobel Bhuiyan, Ph.D., Department of Medicine, Louisiana State University Health Sciences  
12 Center at Shreveport, PO Box 33932, Shreveport, LA 71130- 3932. Email: [Nobel.Bhuiyan@lsuhs.edu](mailto:Nobel.Bhuiyan@lsuhs.edu)

Heart disease is the leading cause of death worldwide, and cardiac function as measured by ejection fraction (EF) is an important determinant of outcomes, making accurate measurement a critical parameter in PT evaluation. Echocardiograms are commonly used for measuring EF, but human interpretation has limitations in terms of intra- and inter-observer (or reader) variance. Deep learning (DL) has driven a resurgence in machine learning, leading to advancements in medical applications. We introduce the ViViEchoformer DL approach, which uses a video vision transformer to directly regress the left ventricular function (LVEF) from echocardiogram videos. The study used a dataset of 10,030 apical-4-chamber echocardiography videos from patients at Stanford University Hospital. The model accurately captures spatial information and preserves inter-frame relationships by extracting spatiotemporal tokens from video input, allowing for accurate, fully automatic EF predictions that aid human assessment and analysis. The ViViEchoformer's prediction of ejection fraction has a mean absolute error of 6.14%, a root mean squared error of 8.4%, a mean squared log error of 0.04, and an  $R^2$  of 0.55. ViViEchoformer predicted heart failure with reduced ejection fraction (HFrEF) with an area under the curve of 0.83 and a classification accuracy of 87 using a standard threshold of less than 50% ejection fraction. Our video-based method provides precise left ventricular function quantification, offering a reliable alternative to human evaluation and establishing a fundamental basis for echocardiogram interpretation.

## 13 INTRODUCTION

14 Cardiovascular diseases (CVDs) encompass a range of conditions that can negatively impact the health  
15 of the cardiovascular system, which consists of the heart and blood vessels. CVDs are consistently  
16 ranked as one of the top causes of death worldwide <sup>1</sup>. Heart failure (HF) is a rapidly growing  
17 cardiovascular condition, with an estimated prevalence of 37.7 million individuals worldwide. HF is a  
18 chronic phase of cardiac functional impairment, causing symptoms such as dyspnea, fatigue, poor  
19 exercise tolerance, and fluid retention, which impact patients' quality of life and contribute to the global  
20 health crisis <sup>2</sup>. It also carries a high mortality rate. Diagnosing heart failure requires an accurate  
21 assessment of cardiac function, which can be done using various methodologies to quantify and  
22 characterize. Left ventricular EF is one of the most important metrics for assessing cardiac function, which  
23 measures how well the left ventricle can eject blood <sup>3,4</sup>.

24 Standard methods for estimating left ventricular ejection fraction include echocardiograms, cardiac MRI,  
25 cardiac computed tomography (CT), and Equilibrium Radionuclide Angiocardigraphy (ERNA).  
26 Echocardiography uses ultrasound to create real-time images of the heart's chambers, valves, and blood  
27 flow, assessing the volume of blood pumped out of the left ventricle with each contraction. MRI provides  
28 detailed images of the heart's structure and function but has limitations such as cost, availability, and  
29 potential contraindications. CT uses X-rays to produce detailed heart images but has limitations such as  
30 radiation exposure, allergic reactions to contrast media, and limited dynamic heart function assessment.

31 Equilibrium radionuclide angiography is a method used in nuclear medicine studies. Still, it has some  
32 drawbacks, like taking a long time to process, injecting radiopharmaceutical agents, and yielding low  
33 resolution for regional ventricular function in heart disease patients<sup>3,5</sup>. Clinically echocardiography is the  
34 preferred most common method for estimating LVEF because it is widely available, provides real-time  
35 imaging, is non-invasive, and is more cost-effective than other options. This makes it particularly useful  
36 for quick and detailed assessments in various clinical situations.

37 Traditional echocardiography typically includes a visual interpretation to estimate LVEF, providing a  
38 qualitative assessment without precise numerical values. This approach is well-suited for managing acute  
39 patients but falls short when it comes to serial evaluations, particularly in patients with valvular lesions  
40 causing regurgitation. There are also quantitative capabilities for echocardiography using the Simpson's  
41 method and fractional shortening to calculate EF. The human calculation of ejection fraction is subject to  
42 variability due to irregular heart rate and the nature of the calculation, which necessitates manual ventricle  
43 size tracing for every beat<sup>4</sup>. The variability in estimating LVEF among different observers can often result  
44 in requests for additional testing, review of the study, and reinterpretation, which can impact the timing of  
45 therapeutic interventions<sup>5-7</sup>.

46 Conventional Machine learning (ML) has recently led to substantial advancements in diverse fields,  
47 including medical applications. Conventional ML has been utilized in echocardiography to determine the  
48 ejection fraction, with significant interest in their potential to provide improvement in disease diagnoses,  
49 aid decision-making, and serve as a confirmatory assessment<sup>8,9</sup>. However, conventional ML has a  
50 potential disadvantage in its reliance on feature engineering, which is a manual and time-consuming  
51 process. Moreover, despite obtaining images in various positions and orientations, these conventional  
52 echocardiographic systems lack 3D localization and spatial relation measurements for volume  
53 computation.

54 Deep learning has driven a significant resurgence in machine learning due to availability of large data  
55 sets, and advances in computing power<sup>10-15</sup>. This field has revolutionized machine learning by  
56 understanding and manipulating data, including images<sup>16,17</sup>, and incorporation of natural language  
57 processing (NLP)<sup>18</sup>. Moreover, deep learning differs from conventional methods as it avoids manual  
58 feature engineering. Also, using deep learning techniques in medical diagnostics improves the accuracy  
59 of diagnoses<sup>19,20</sup>. It plays a crucial role in predictive analytics, allowing for detecting possible health risks  
60 or outcomes<sup>21</sup>. These techniques provide healthcare professionals with valuable predictive insights  
61 through the assimilation and analysis of various datasets, including patient information, genetic profiles,  
62 imaging studies, and clinical records, and enables early detection of diseases or health deterioration<sup>22</sup>.

63 Deep learning techniques can be used to determine ejection fraction, estimate end-diastole and end-  
64 systole volumes, and calculate the percentage difference between them, rather than relying on actual  
65 echocardiogram videos<sup>23-27</sup>. A recently proposed method, EchoNet-Dynamic<sup>4</sup>, directly regresses LVEF  
66 from video inputs using spatiotemporal models, which avoids the need to estimate EDV and ESV  
67 separately. EchoNet-Dynamic, a video-based deep learning model, has been proposed for  
68 echocardiograms, demonstrating its ability to assess ejection fraction accurately across the entire video. It  
69 is a CNN model that uses atrous convolution<sup>28</sup> for semantic segmentation of the left ventricle, a CNN  
70 model<sup>29</sup> with residual connections and spatiotemporal convolutions for predicting the ejection fraction,  
71 and video-level predictions for beat-to-beat estimations of cardiac function. Moreover, another video-  
72 based method performs LV segmentation using echocardiogram sequences and then converts the  
73 predicted context into an end-to-end video regression model<sup>30</sup>. However, segmentation, a sensitive  
74 process involving categorizing entire regions, may increase computational requirements and processing  
75 times. Inaccuracies in segmentation can impact subsequent classification or regression tasks, making the  
76 overall process more sensitive to segmentation quality. Recent advances in deep learning have shown  
77 that it can accurately and reproducibly identify human-identifiable phenotypes and characteristics not  
78 recognized by human experts, overcoming limitations in human interpretation<sup>31-33</sup>.

**Table 1.** Details of model variants

| Parameter name                  | Values          |
|---------------------------------|-----------------|
| <b>Hyperparameters of ViViT</b> |                 |
| Optimizer                       | SGD             |
| Batch size                      | 128             |
| Epoch                           | 100             |
| Input Shape                     | (52, 52, 32, 1) |
| Layer norm                      | 1e-6            |
| Learning rate                   | 1e-4            |
| Number of heads                 | 12              |
| Number of Layers                | 10              |
| Patch size                      | (32, 8, 8)      |
| Projection dim                  | 512             |

79 Herein, we propose an end-to-end deep learning approach, ViViEchoformer, which leverages a video  
 80 vision transformer (ViViT)<sup>34</sup> to regress LVEF from echocardiogram videos directly. We converted ViViT  
 81 from classification to regression to predict LVEF. The model captures spatial information and preserves  
 82 inter-frame relationships by extracting spatiotemporal tokens from the input video. While utilizing the  
 83 video vision transformer to capture spatiotemporal patterns in the video accurately, this method performs  
 84 precise, fully automatic EF predictions that facilitate human assessment and subsequent analysis.

## 85 RESULTS

86 Our neural network architecture was implemented in Python using the TensorFlow and Keras libraries. A  
 87 workstation equipped with 62 GB of RAM and an NVIDIA GeForce GTX 4080 GPU was used for all  
 88 experiments. We trained our transformer model (**Fig 1**) on a data set with 10,030 echocardiogram videos  
 89 provided by Stanford University Hospital<sup>35</sup>. We converted the classification model ViViT, into a regression  
 90 model and trained it to estimate the left ventricular ejection fraction from echocardiogram videos using a  
 91 training and validation set of over 30700 and 1200 videos, respectively, and a test set of over 1200  
 92 videos. The analysis focused on the 32 frames of videos that were resized to 52x52 dimensions.

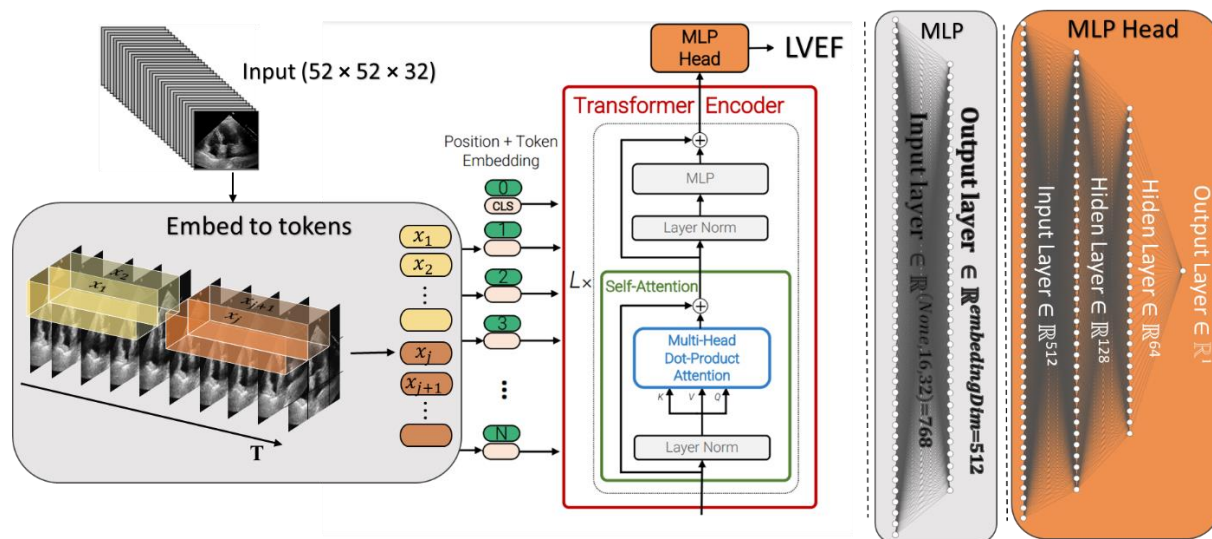

**Fig 1.** The model pipeline for video regression. The Tubelet embedding technique extracts and linearly embeds nonoverlapping tubelets across the spatio-temporal input volume. Using spatial-temporal attention, the transformer encoder forwards all spatio-temporal tokens extracted from the video.

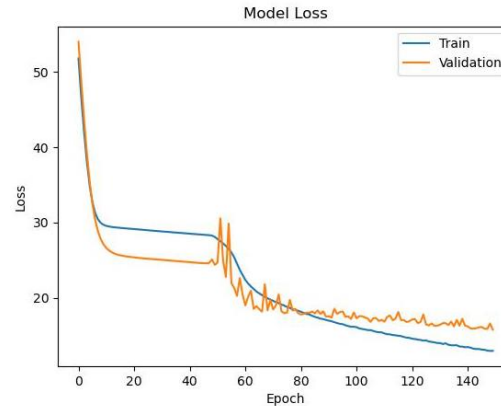

**Fig 2.** The graph illustrates the model's loss over epochs for training (blue) and validation (orange) datasets.

93 We employed the SGD optimizer for training, and the training process was conducted over 100 epochs  
94 with a batch size of 128 and a learning rate of 1e-4. **Table 1** provides a summary of the configuration of  
95 the training parameters. The model checkpoint is configured to save only the optimal solution discovered  
96 during training based on the loss function evaluation during validation. The model checkpoint is saved  
97 when a metric improves on a validation set during training. As depicted in **Fig 2**, the model demonstrates  
98 a significant reduction in loss in the initial epochs, which indicates the model's capacity to learn quickly  
99 from the training data.

100 We have employed the evaluation metrics for evaluating the performance of ViViEchoformer on the  
101 EchoNet test dataset, which were not previously used during model training. The estimation of EF has  
102 been associated with interobserver variability of up to 14%<sup>36</sup>. The ViViEchoformer's prediction of ejection  
103 fraction had a mean absolute error of 6.14%, root mean squared error of 8.4%, mean squared log error of  
104 0.04, and an  $R^2$  of 0.55.

105 The visual assessment has been carried out using six plots (**Fig 3**). These plots are used to evaluate the  
106 performance of a predictive model, providing information about the accuracy, distribution of errors, and  
107 independence of errors, which are crucial for validating the robustness of the model. The scatter plot **Fig**  
108 **3a** shows the model's predictions against the actual values, with points scattered around the line of  
109 perfect agreement. This indicates that the model captures the trend in the data, but the spread of points  
110 away from the line indicates variances in prediction accuracy. The violin plot and histogram of error  
111 distribution **Fig 3b, c** provide insight into the distribution of prediction errors, with a long tail of errors  
112 indicating a right-skewed distribution. The line plot of errors in **Fig 3d** shows variability, with most falling  
113 within two standard deviations of the mean. However, occasional spikes beyond this range suggest more  
114 significant errors, possibly due to outliers or less valid assumptions. The autocorrelation and partial  
115 autocorrelation plots in **Fig 3e, f** show that the errors are mostly independent, indicating a positive  
116 predictive model performance.

117 **Table 2** reports the model's classification performance distinguishing between Heart Failure with Reduced  
118 Ejection Fraction (HFrEF) and Non-HFrEF cases. Precision, recall, f1-score, and support numbers are  
119 reported for both categories. The classification report shows ViViEchoformer's prediction of HFrEF with an  
120 area under the curve of 0.83 (**Fig 4a**), using a common threshold of an EF of less than 50%. The model  
121 achieves a precision of 0.77 for HFrEF cases, indicating 77% correctness, and a recall of 0.83, indicating  
122 83% correct identification. The f1-score balances these metrics, indicating the model's effectiveness in  
123 HFrEF cases. However, the model performs better for non-HFrEF cases, with a precision of 0.91 and  
124 recall of 0.92, resulting in a higher f1-score of 0.89. The overall accuracy across both classes is 0.87,  
125 indicating 87% correct classifications. The macro average f1-score is 0.83, considering the balance  
126 between classes without weighting for their representation in the dataset. The weighted average f1-score  
127 is also 0.87, indicating consistent high performance across classes when accounting for the number of  
128 samples in each. **Fig 4b** illustrates the confusion matrix for our model's classification performance where

**a**

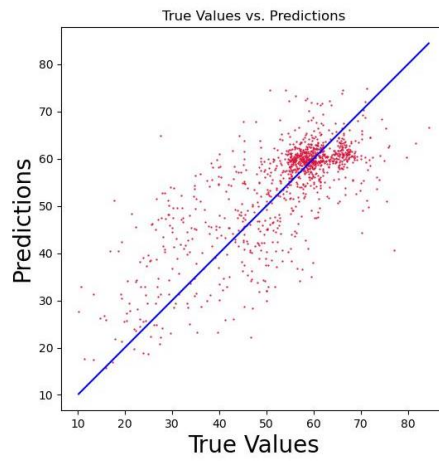

**b**

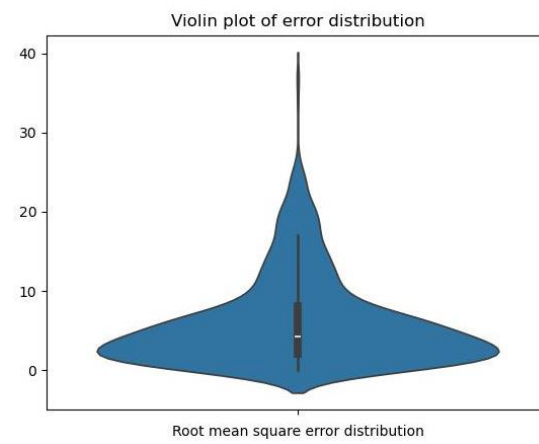

**c**

**d**

129 HFrEF is labeled 0, and Non-HFrEF is labeled 1. The matrix visually represents the model's predictions  
130 compared to the actual labels.

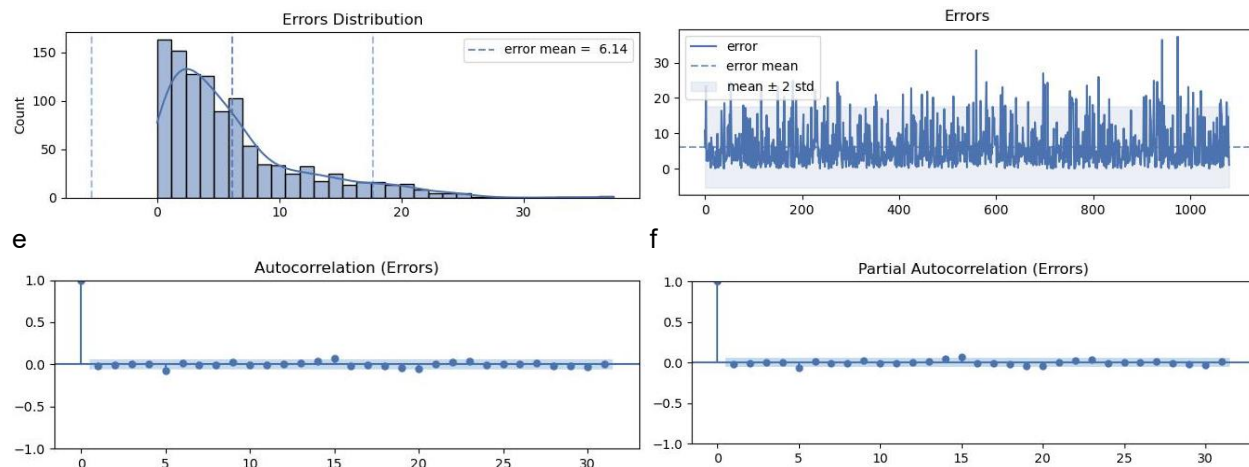

**Fig 3. Model Evaluation.** **a** Comparison of ViViEchoformer predicted, and EchoNet dataset reported ejection fractions ( $n = 1288$ ). **b** the violin plot showcasing the model error distribution. **c** errors distribution histogram. **d** error values across samples. **e** Autocorrelation plot of residuals. **f** partial autocorrelation of the residuals.

## 131 DISCUSSION

132 The most prominent architecture of choice in sequence modeling is the transformer, which uses a multi-  
 133 headed self-attention mechanism instead of convolution. ViViEchoformer is a video transformer-based  
 134 deep learning model for echocardiogram video understanding tasks, allowing for accurate, fully automatic  
 135 EF predictions that aid human assessment and analysis. To our knowledge, ViViEchoformer is the first  
 136 deep-learning model that uses transformers to estimate the ejection fraction from echocardiogram videos.  
 137 Previous attempts to use deep learning techniques are primarily used to determine EFs, end-diastole and  
 138 end-systole volumes, and percentage differences in echocardiogram videos rather than actual data.  
 139 These methods typically do not account for inter-frame relationships or temporal dependencies within the  
 140 video sequences during their analysis. To process video sequences, ViViEchoformer splits them up into  
 141 smaller temporal and spatial units known as tokens. The model can then comprehend temporal  
 142 dependencies throughout the sequence and spatial relationships within individual frames thanks to  
 143 extracting and processing information from these tokens across frames.

144 Some video-based methods perform LV segmentation using echocardiogram sequences, but  
 145 segmentation may increase computational requirements and processing times due to its sensitive nature.  
 146 However, when analyzing massive datasets, DL techniques can reveal hidden patterns that were  
 147 previously not apparent. Recent advancements in DL techniques have demonstrated their ability to "see  
 148 the unseen" in images and videos. Consequentially, determining EFs without end-diastole and end-  
 149 systole volumes could be possible for DL techniques. Without infusing knowledge awareness and using  
 150 any pre-processing, such as segmentation, our method directly regresses EF among the video frames.  
 151 ViViEchoformer's predictions have a variance comparable to or less than human experts' measurements  
 152 of cardiac function<sup>37</sup>. ViViEchoformer achieved high prediction accuracy for estimating ejection fraction  
 153 performed by human interpreters. Its prediction of ejection fraction had a mean absolute error of 6.14%,  
 154 which is within the typical inter-observer variation of 14%.

**Table 2.** Classification performance for HFrEF and Non-HFrEF cases

|              | precision | recall | f1-score | support |
|--------------|-----------|--------|----------|---------|
| HFrEF        | 0.77      | 0.74   | 0.75     | 285     |
| Non-HFrEF    | 0.91      | 0.92   | 0.71     | 794     |
| accuracy     |           |        | 0.87     | 1079    |
| macro avg    | 0.84      | 0.83   | 0.83     | 1079    |
| weighted avg | 0.87      | 0.87   | 0.87     | 1079    |

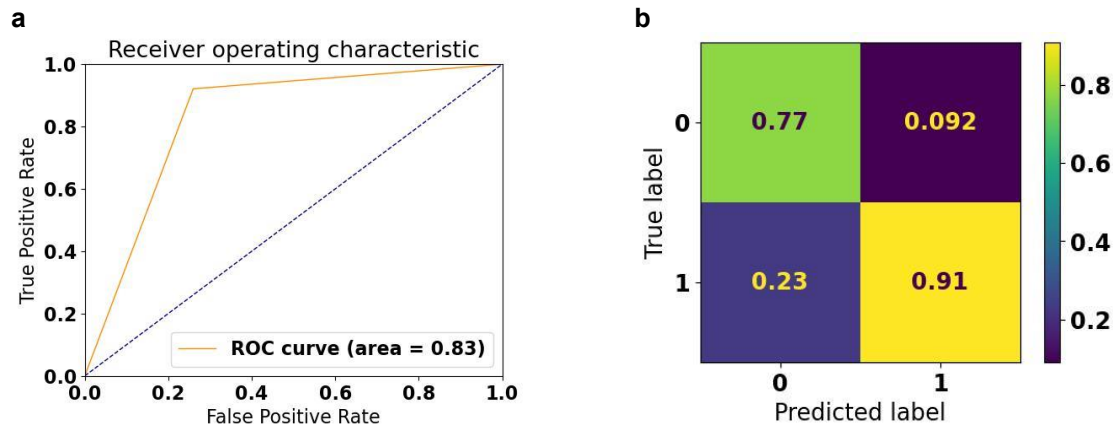

**Fig 4.** Classification accuracy of 85 and AUC of 0.83 using a standard threshold of less than 50% EF. a ROC curve, b Confusion matrix where HFrEF, labeled as 0 and non-HFrEF labeled 1.

155 In the study by Ouyang et al.<sup>4</sup>, five expert sonographers and cardiologists conducted a blinded review of  
156 echocardiogram videos that exhibited the largest absolute differences between the initial human labels  
157 and the predictions made by EchoNet-Dynamic. These experts independently assessed the relevant  
158 videos and two blinded measurements of ejection fraction. The findings revealed that 38% (15 out of 40)  
159 of the videos had significant issues related to video quality or the acquisition process. In comparison, 13%  
160 (5 out of 40) were characterized by marked arrhythmias, which constrained the experts' capacity to  
161 assess ejection fraction accurately. A critical limitation of the EchoNet-Dynamic dataset stems from the  
162 inaccuracy in the initial human labeling of echocardiogram videos, compounded by issues related to poor  
163 image quality, arrhythmias, and variations in heart rate. These factors significantly impact on the training  
164 and evaluation performance of our model.

165 In developing a model to regress the left ventricular ejection fraction (LVEF) from echocardiogram videos,  
166 we encountered a nuanced issue at the intersection of statistical significance and clinical utility,  
167 particularly when classifying LVEF based on the 50% cutoff. Our model is capable of closely  
168 approximating actual LVEF values. Yet, we observe instances where minor discrepancies—such as a  
169 predicted LVEF of 49.9% versus an actual measurement of 50.01%—raise important considerations.  
170 While these small differences may be statistically significant, they highlight the clinical uncertainty of near-  
171 threshold predictions in model evaluation. This distinction is important because, in clinical practice, the  
172 marginal difference may not change treatment or patient outcome, calling statistically significant but  
173 clinically marginal model predictions into question. This is a limitation for most methodologies and should  
174 be acknowledged.

175 **Fig 5** presents a scatter plot evaluating the performance of a regression model that predicts left  
176 ventricular ejection fraction (LVEF). The true LVEF values are on the X-axis, while the Y-axis displays the  
177 model's predicted LVEF values. The overlay of a green zone and an orange area indicates the boundary  
178 of correct and incorrect classifications by the model relative to the critical threshold of 50%. The green  
179 zone indicates regions where the model's predictions align correctly with the true classifications—  
180 predictions of LVEF less than 50% that are indeed below 50% (lower left) and predictions above 50% that  
181 are actually above 50% (upper right). Conversely, the orange zone indicates regions of misclassification—  
182 predictions above 50% for true values below 50% (lower right) and vice versa (upper left). Central to the  
183 plot is a highlighted square around the 50% line, visually representing the area of uncertainty where the  
184 model's predictions are close to the threshold, encapsulating the challenge of near-threshold predictions.  
185 This zone of uncertainty underscores the difficulty in achieving precise classifications around the 50%  
186 cutoff point, which is critical for clinical decision-making based on LVEF values.

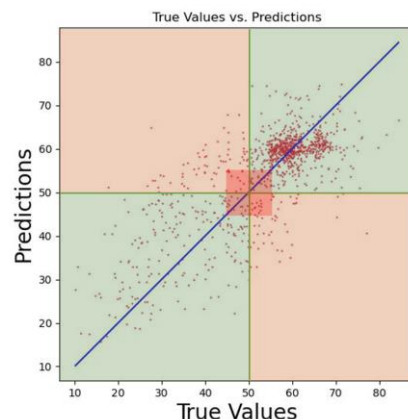

**Fig 5.** Scatter plot of true vs. predicted LVEF values by the regression model, illustrating classification accuracy relative to the 50% threshold. The green area represents correct classifications, while the orange area signifies incorrect classifications. The highlighted square around the 50% line delineates the zone of uncertainty, emphasizing the model's challenge in making near-threshold predictions.

187 The study suggests that future research could focus on developing advanced classification models to  
188 identify videos with poor image quality, arrhythmias, and heart rate variations. This would improve the  
189 reliability of automated assessments by reducing the impact of the issues mentioned earlier on model  
190 predictions, thereby enhancing the accuracy of ejection fraction prediction.

## 191 **METHOD**

### 192 **Data management**

193 The study used a dataset of 10,030 apical-4-chamber echocardiography videos from patients at Stanford  
194 University Hospital between 2016 and 2018 <sup>38</sup>. The data was meticulously preprocessed to ensure  
195 integrity and uniformity, including cropping and masking operations. The videos were then down-sampled  
196 to a uniform resolution of 112x112 pixels using cubic interpolation, ensuring the quality of the visual data  
197 and compatibility with the analytical framework. This dataset is crucial for understanding cardiac function  
198 representations in full resting echocardiogram studies. The dataset was divided into test, validation, and  
199 training sets, with 1,277, 1,288, and 7,462 videos in each set. The histogram in **Fig 6a** visually represents  
200 the EF values in the training set, showcasing the range from 6.90 to 96.96. The histogram shows a  
201 dataset's imbalanced distribution of ejection fraction values, with a significant concentration in the 55% to  
202 70% range. Consequently, the pattern and spread of EFs around the line indicate how the points in the  
203 55% and 70% ranges are closely scattered around a diagonal line (**Fig 3a**). This imbalance can affect the  
204 performance of predictive models trained on this data, potentially leading to bias toward predicting values  
205 in the most common range. Additionally, a scatter plot was included to illustrate the spread of ejection  
206 fraction values within the training dataset (**Fig 6c, d**).



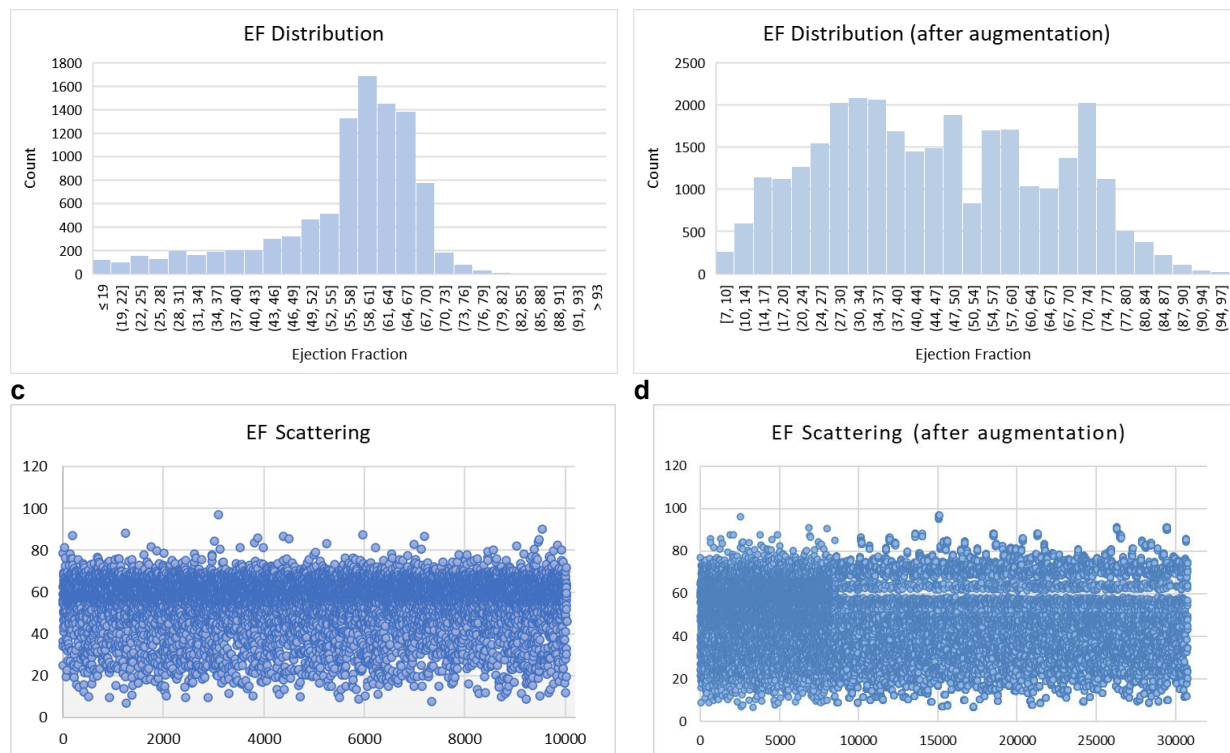

**Fig 6.** Comparative distribution of EF values in the training dataset before and after data augmentation and down-sampling techniques. The initial dataset (a) consisted of 7462 samples, while the augmented dataset (b) expanded to 30787 samples, illustrating the effect of augmentation and balancing strategies on the EF value distribution. c and d represent the spread of EF before and after augmentation in the training dataset.

207 In the initial examination of our training dataset, we identified a skewed distribution of EF values, which  
 208 threatened to bias our predictive model towards the more common EF ranges, thereby impairing its  
 209 generalizability. We first addressed the variability in frame counts to ensure uniformity in video clip length.  
 210 Videos with fewer than 32 frames were lengthened by padding the last frame, whereas for videos with  
 211 fewer than 64 frames, we employed 32 random samples to standardize their length. For videos containing  
 212 64 frames or more, we generated 32-frame echocardiogram clips by sampling every second frame. This  
 213 preprocessing protocol was applied to all videos to create a consistent structure for subsequent steps.  
 214 Following this standardization, we specifically targeted the underrepresented EF values for augmentation.  
 215 For videos with an excess of 64 frames, we generated two distinct clips with variable starting points by  
 216 sampling every other frame, effectively doubling the representation of these EF ranges. This  
 217 augmentation, performed prior to any down-sampling, was crucial in addressing the initial data imbalance.  
 218 In the subsequent phase, we down-sampled the overrepresented EF values to balance the dataset. Later,  
 219 the underrepresented values are applied to each frame through a series of image transformations,  
 220 including rotation, zoom, shift, and shear. A random factor between 0.99 and 1.01 also changed the EF  
 221 value for each augmented video. This was done to maintain physiological plausibility and add a realistic  
 222 range. The histogram in **Fig 6b** visually represents the EF values in the training set after augmentation.

## 223 Preprocessing

224 Accurately assessing cardiac function using echocardiograms is crucial to minimize noise and ensure  
 225 high-quality data for accurate interpretation. To address this, we developed a comprehensive  
 226 preprocessing pipeline that enhances the interpretability of echocardiogram frames.

227 The preprocessing method starts with 32 echocardiogram frames with a 52x52 pixel resolution. The  
 228 median frame is calculated by determining the median value of each pixel location across all 32 frames  
 229 (temporal dimension), resulting in a singular 52x52 matrix. Then, a frame-wise multiplication operation is  
 230 performed on each original video frame, resulting in a transformed video with identical dimensions but

231 modified pixel values by multiplying the corresponding median pixel values. This meticulous operation is  
 232 performed for all 32 frames in the sequence. Subsequently, histogram equalization was applied to each  
 233 frame to adjust contrast and improve the visibility of cardiac structures, followed by a median blur filter  
 234 with a 3x3 pixel mask to reduce noise while preserving essential anatomical details. **Fig 7** compares the  
 235 first 10 frames of the original video and their preprocessed counterparts, showing the significant  
 236 improvements.

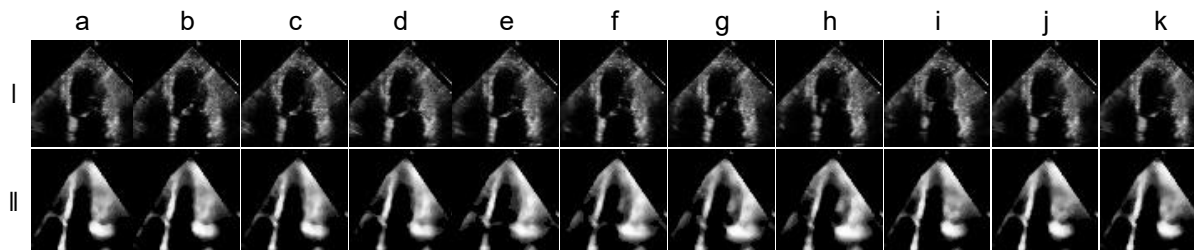

**Fig 7.** Sequential visualization of echocardiogram frame preprocessing. The top row (a-k) displays the first 11 original frames from the echocardiogram video, demonstrating the raw imaging data. After applying our preprocessing steps, the bottom row (a-k) illustrates the corresponding frames: median frame calculation, frame-wise multiplication, histogram equalization, and median blur filtering. The processed frames reveal a marked enhancement in the definition and contrast of cardiac structures, providing a clear visual distinction from the original frames and underscoring the efficacy of the preprocessing technique.

### 237 Video-based transformer model and training

238 The Vision Transformer (ViT) is a pure-transformer architecture that has outperformed convolutional  
 239 neural networks in image classification, offering a competitive alternative to the widely used convolutional  
 240 neural networks in computer vision<sup>34,39</sup>. The ViViT architecture, inspired by the ViT, provides a new  
 241 approach to video classification. It uses transformer-based models, leveraging attention-based  
 242 mechanisms to model long-range contextual relationships in video content. This innovative approach  
 243 offers a strategic alternative to conventional 3D CNNs<sup>40</sup> and RNNs<sup>41</sup>, allowing for more accurate and  
 244 efficient video classification.

245 Even though ViViT is an efficient video classification model, we trained the ViViT from scratch to directly  
 246 regress the LVEF from echocardiogram videos. The model performed self-attention, computed on a  
 247 sequence of spatio-temporal patches we extracted from the echocardiogram videos. We initially replaced  
 248 the final layer of the classifier head, intended to output various classes, with a new layer designed to  
 249 produce a single, continuous output. There is only one output unit in this new layer and no activation  
 250 function. The tubelet embedding of the echocardiogram frames feeds the model with nonoverlapping  
 251 spatiotemporal information.

252 The model is structured around a sequence of ten transformer layers. Each layer consists of twelve  
 253 heads. The token size (model dimension) was set to  $d = 512$ . The hidden size of multi-layer perceptron

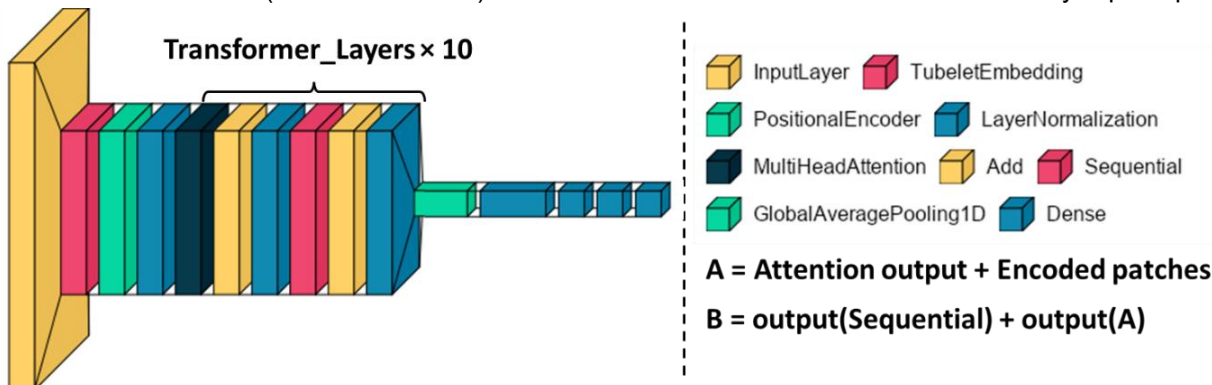

**Fig 8.** The layered structure of a neural network model. The diagram showcases the arrangement of various layers, including multi-head attention, encoder, and dense layers, illustrating the flow of information within the model.

254 (MLP) was 768. The output of the tokens is then transformed into a regression prediction via an MLP as  
255 non-linearity in the three hidden layers of 512, 128, and 64. **Fig 8** illustrates the layered structure of our  
256 model.

## 257 **Data availability**

258 The EchoNet-Dynamic dataset was used in this project. It is a public dataset of de-identified  
259 echocardiogram videos found at <https://echonet.github.io/dynamic/>.

## 260 **ACKNOWLEDGEMENTS**

261 Three National Institutes of Health grants supported this work: R01HL145753, R01HL145753-01S1, and  
262 R01HL145753-03S1; in addition, the work was supported by LSUHSC-S CCDS Finish Line Award,  
263 COVID-19 Research Award, and LARC Research Award to MSB; Jane Cheever Powell Foundation for  
264 Cardiovascular Research Related to Gender and Isolation, LSUHS to SRB; and Institutional Development  
265 Award (IDeA) from the National Institutes of General Medical Sciences of the NIH under grant number  
266 P20GM121307 and R01HL149264 to CGK.

## 267 **Author Contributions Statement**

268 Initial study concept and design: MANB, TA. Acquisition of data: TA. Model training: TA, SA. Analysis and  
269 interpretation of data: TA, SA. Drafting of the paper: TA. Critical revision of the manuscript for important  
270 intellectual content: MANB. Statistical analysis: TA, SA, MANB. Reading, editing, and approving the  
271 paper: All the authors.

## 272 **Competing interests**

273 The authors declare no competing interests.

## 274 **Ethical Approval and Consent to participate**

275 Not applicable.

## 276 **Replication of results**

277 The codes and data used are available on request to enable the method proposed in the manuscript to be  
278 replicated by readers.

## 279 **REFERENCES**

- 280 1. Robinson S. Cardiovascular disease. Priorities for Health Promotion and Public Health [Internet]  
281 2021 [cited 2023 Nov 14];355–93. Available from:  
282 [https://www.taylorfrancis.com/chapters/edit/10.4324/9780367823689-16/cardiovascular-disease-](https://www.taylorfrancis.com/chapters/edit/10.4324/9780367823689-16/cardiovascular-disease-sally-robinson)  
283 [sally-robinson](https://www.taylorfrancis.com/chapters/edit/10.4324/9780367823689-16/cardiovascular-disease-sally-robinson)
- 284 2. Ziaeeian B, Fonarow GC. Epidemiology and aetiology of heart failure. Nature Reviews Cardiology  
285 2016 13:6 [Internet] 2016 [cited 2023 Nov 23];13(6):368–78. Available from:  
286 <https://www.nature.com/articles/nrcardio.2016.25>
- 287 3. Savarese G, Stolfo D, Sinagra G, Lund LH. Heart failure with mid-range or mildly reduced ejection  
288 fraction. Nature Reviews Cardiology 2021 19:2 [Internet] 2021 [cited 2023 Nov 18];19(2):100–16.  
289 Available from: <https://www.nature.com/articles/s41569-021-00605-5>
- 290 4. Ouyang D, He B, Ghorbani A, et al. Video-based AI for beat-to-beat assessment of cardiac  
291 function. Nature 2020 580:7802 [Internet] 2020 [cited 2023 Nov 18];580(7802):252–6. Available  
292 from: <https://www.nature.com/articles/s41586-020-2145-8>
- 293 5. Gopal AS, Shen Z, Sapin PM, et al. Assessment of Cardiac Function by Three-dimensional  
294 Echocardiography Compared With Conventional Noninvasive Methods. Circulation [Internet] 1995

- 295 [cited 2023 Nov 18];92(4):842–53. Available from:  
296 <https://www.ahajournals.org/doi/abs/10.1161/01.CIR.92.4.842>
- 297 6. Lang RM, Badano LP, Mor-Avi V, et al. Recommendations for Cardiac Chamber Quantification by  
298 Echocardiography in Adults: An Update from the American Society of Echocardiography and the  
299 European Association of Cardiovascular Imaging. *Eur Heart J Cardiovasc Imaging* [Internet] 2015  
300 [cited 2023 Nov 24];16(3):233–71. Available from: <https://dx.doi.org/10.1093/ehjci/jev014>
- 301 7. Farsalinos KE, Daraban AM, Ünlü S, Thomas JD, Badano LP, Voigt JU. Head-to-Head  
302 Comparison of Global Longitudinal Strain Measurements among Nine Different Vendors: The  
303 EACVI/ASE Inter-Vendor Comparison Study. *Journal of the American Society of Echocardiography*  
304 2015;28(10):1171-1181.e2.
- 305 8. Cannesson M, Tanabe M, Suffoletto MS, et al. A Novel Two-Dimensional Echocardiographic Image  
306 Analysis System Using Artificial Intelligence-Learned Pattern Recognition for Rapid Automated  
307 Ejection Fraction. *J Am Coll Cardiol* 2007;49(2):217–26.
- 308 9. Kim Y, Garvin JH, Goldstein MK, et al. Extraction of left ventricular ejection fraction information  
309 from various types of clinical reports. *J Biomed Inform* 2017;67:42–8.
- 310 10. Esteva A, Robicquet A, Ramsundar B, et al. A guide to deep learning in healthcare. *Nature*  
311 *Medicine* 2019 25:1 [Internet] 2019 [cited 2023 Nov 24];25(1):24–9. Available from:  
312 <https://www.nature.com/articles/s41591-018-0316-z>
- 313 11. van der Laak J, Litjens G, Ciompi F. Deep learning in histopathology: the path to the clinic. *Nature*  
314 *Medicine* 2021 27:5 [Internet] 2021 [cited 2023 Nov 24];27(5):775–84. Available from:  
315 <https://www.nature.com/articles/s41591-021-01343-4>
- 316 12. Wainberg M, Merico D, DeLong A, Frey BJ. Deep learning in biomedicine. *Nature Biotechnology*  
317 2018 36:9 [Internet] 2018 [cited 2023 Nov 24];36(9):829–38. Available from:  
318 <https://www.nature.com/articles/nbt.4233>
- 319 13. Moen E, Bannon D, Kudo T, Graf W, Covert M, Van Valen D. Deep learning for cellular image  
320 analysis. *Nature Methods* 2019 16:12 [Internet] 2019 [cited 2023 Nov 24];16(12):1233–46.  
321 Available from: <https://www.nature.com/articles/s41592-019-0403-1>
- 322 14. Esteva A, Chou K, Yeung S, et al. Deep learning-enabled medical computer vision. *npj Digital*  
323 *Medicine* 2021 4:1 [Internet] 2021 [cited 2023 Nov 24];4(1):1–9. Available from:  
324 <https://www.nature.com/articles/s41746-020-00376-2>
- 325 15. Aggarwal R, Sounderajah V, Martin G, et al. Diagnostic accuracy of deep learning in medical  
326 imaging: a systematic review and meta-analysis. *npj Digital Medicine* 2021 4:1 [Internet] 2021  
327 [cited 2023 Nov 24];4(1):1–23. Available from: [https://www.nature.com/articles/s41746-021-00438-](https://www.nature.com/articles/s41746-021-00438-z)  
328 [z](https://www.nature.com/articles/s41746-021-00438-z)
- 329 16. Lin TY, Maire M, Belongie S, et al. Microsoft COCO: Common objects in context. *Lecture Notes in*  
330 *Computer Science* (including subseries *Lecture Notes in Artificial Intelligence* and *Lecture Notes in*  
331 *Bioinformatics*) [Internet] 2014 [cited 2023 Nov 24];8693 LNCS(PART 5):740–55. Available from:  
332 [https://link.springer.com/chapter/10.1007/978-3-319-10602-1\\_48](https://link.springer.com/chapter/10.1007/978-3-319-10602-1_48)
- 333 17. Russakovsky O, Deng J, Su H, et al. ImageNet Large Scale Visual Recognition Challenge. *Int J*  
334 *Comput Vis* [Internet] 2015 [cited 2023 Nov 24];115(3):211–52. Available from:  
335 <https://link.springer.com/article/10.1007/s11263-015-0816-y>
- 336 18. Hirschberg J, Manning CD. Advances in natural language processing. *Science* (1979) [Internet]  
337 2015 [cited 2023 Nov 24];349(6245):261–6. Available from:  
338 <https://www.science.org/doi/10.1126/science.aaa8685>
- 339 19. Litjens G, Sánchez CI, Timofeeva N, et al. Deep learning as a tool for increased accuracy and  
340 efficiency of histopathological diagnosis. *Scientific Reports* 2016 6:1 [Internet] 2016 [cited 2024  
341 Mar 18];6(1):1–11. Available from: <https://www.nature.com/articles/srep26286>
- 342 20. Aggarwal R, Sounderajah V, Martin G, et al. Diagnostic accuracy of deep learning in medical  
343 imaging: a systematic review and meta-analysis. *npj Digital Medicine* 2021 4:1 [Internet] 2021

- 344 [cited 2024 Mar 18];4(1):1–23. Available from: <https://www.nature.com/articles/s41746-021-00438->  
345 z
- 346 21. Odigwe BE, Rajeoni AB, Odigwe CI, Spinale FG, Valafar H. Application of machine learning for  
347 patient response prediction to cardiac resynchronization therapy. Proceedings of the 13th ACM  
348 International Conference on Bioinformatics, Computational Biology and Health Informatics, BCB  
349 2022 [Internet] 2022 [cited 2024 Feb 11]; Available from:  
350 <https://dl.acm.org/doi/10.1145/3535508.3545513>
- 351 22. Rajeoni B, Pederson A, Clair B, et al. Automated Measurement of Vascular Calcification in  
352 Femoral Endarterectomy Patients Using Deep Learning. Diagnostics 2023, Vol 13, Page 3363  
353 [Internet] 2023 [cited 2024 Feb 11];13(21):3363. Available from: <https://www.mdpi.com/2075->  
354 [4418/13/21/3363/htm](https://www.mdpi.com/2075-4418/13/21/3363/htm)
- 355 23. Madani A, Arnaout R, Mofrad M, Arnaout R. Fast and accurate view classification of  
356 echocardiograms using deep learning. npj Digital Medicine 2018 1:1 [Internet] 2018 [cited 2023  
357 Nov 25];1(1):1–8. Available from: <https://www.nature.com/articles/s41746-017-0013-1>
- 358 24. Ghorbani A, Ouyang D, Abid A, et al. Deep learning interpretation of echocardiograms. npj Digital  
359 Medicine 2020 3:1 [Internet] 2020 [cited 2023 Nov 25];3(1):1–10. Available from:  
360 <https://www.nature.com/articles/s41746-019-0216-8>
- 361 25. Wei H, Cao H, Cao Y, et al. Temporal-Consistent Segmentation of Echocardiography with Co-  
362 learning from Appearance and Shape. Lecture Notes in Computer Science (including subseries  
363 Lecture Notes in Artificial Intelligence and Lecture Notes in Bioinformatics) [Internet] 2020 [cited  
364 2023 Nov 25];12262 LNCS:623–32. Available from: <https://link.springer.com/chapter/10.1007/978->  
365 [3-030-59713-9\\_60](https://link.springer.com/chapter/10.1007/978-3-030-59713-9_60)
- 366 26. Reynaud H, Vlontzos A, Hou B, Beqiri A, Leeson P, Kainz B. Ultrasound Video Transformers  
367 for Cardiac Ejection Fraction Estimation. Lecture Notes in Computer Science (including subseries  
368 Lecture Notes in Artificial Intelligence and Lecture Notes in Bioinformatics) [Internet] 2021 [cited  
369 2023 Nov 25];12906 LNCS:495–505. Available from:  
370 [https://link.springer.com/chapter/10.1007/978-3-030-87231-1\\_48](https://link.springer.com/chapter/10.1007/978-3-030-87231-1_48)
- 371 27. Jafari MH, Woudenberg N Van, Luong C, Abolmaesumi P, Tsang T. Deep bayesian image  
372 segmentation for a more robust ejection fraction estimation. Proceedings - International  
373 Symposium on Biomedical Imaging 2021;2021-April:1264–8.
- 374 28. Chen L-C, Papandreou G, Schroff F, Adam H. Rethinking Atrous Convolution for Semantic Image  
375 Segmentation. 2017 [cited 2023 Nov 25]; Available from: <https://arxiv.org/abs/1706.05587v3>
- 376 29. Tran D, Wang H, Torresani L, Ray J, LeCun Y, Paluri M. A closer look at spatiotemporal  
377 convolutions for action recognition. In: Proceedings of the IEEE conference on Computer Vision  
378 and Pattern Recognition. 2018. p. 6450–9.
- 379 30. Dai W, Li X, Ding X, Cheng KT. Cyclical Self-Supervision for Semi-Supervised Ejection Fraction  
380 Prediction From Echocardiogram Videos. IEEE Trans Med Imaging 2023;42(5):1446–61.
- 381 31. Lang RM, Badano LP, Mor-Avi V, et al. Recommendations for Cardiac Chamber Quantification by  
382 Echocardiography in Adults: An Update from the American Society of Echocardiography and the  
383 European Association of Cardiovascular Imaging. Eur Heart J Cardiovasc Imaging [Internet] 2015  
384 [cited 2023 Nov 25];16(3):233–71. Available from: <https://dx.doi.org/10.1093/ehjci/jev014>
- 385 32. Poplin R, Varadarajan A V., Blumer K, et al. Prediction of cardiovascular risk factors from retinal  
386 fundus photographs via deep learning. Nature Biomedical Engineering 2018 2:3 [Internet] 2018  
387 [cited 2023 Nov 25];2(3):158–64. Available from: <https://www.nature.com/articles/s41551-018->  
388 [0195-0](https://www.nature.com/articles/s41551-018-0195-0)
- 389 33. Hughes JW, Tooley J, Torres Soto J, et al. A deep learning-based electrocardiogram risk score for  
390 long term cardiovascular death and disease. npj Digital Medicine 2023 6:1 [Internet] 2023 [cited  
391 2023 Nov 25];6(1):1–9. Available from: <https://www.nature.com/articles/s41746-023-00916-6>

- 392 34. Arnab A, Dehghani M, Heigold G, Sun C, Lučić ML, Schmid C. ViViT: A Video Vision Transformer.  
393 2021;6836–46.
- 394 35. Ouyang D, He B, Ghorbani A, et al. Echonet-dynamic: a large new cardiac motion video data  
395 resource for medical machine learning. In: NeurIPS ML4H Workshop: Vancouver, BC, Canada.  
396 2019.
- 397 36. Thavendiranathan P, Popović ZB, Flamm SD, Dahiya A, Grimm RA, Marwick TH. Improved  
398 Interobserver Variability and Accuracy of Echocardiographic Visual Left Ventricular Ejection  
399 Fraction Assessment through a Self-Directed Learning Program Using Cardiac Magnetic  
400 Resonance Images. *Journal of the American Society of Echocardiography* 2013;26(11):1267–73.
- 401 37. Lang RM, Badano LP, Mor-Avi V, et al. Recommendations for cardiac chamber quantification by  
402 echocardiography in adults: an update from the American Society of Echocardiography and the  
403 European Association of Cardiovascular Imaging. *European Heart Journal-Cardiovascular Imaging*  
404 2015;16(3):233–71.
- 405 38. Ouyang D, He B, Ghorbani A, et al. Echonet-dynamic: a large new cardiac motion video data  
406 resource for medical machine learning. In: NeurIPS ML4H Workshop: Vancouver, BC, Canada.  
407 2019.
- 408 39. Ouyang D, He B, Ghorbani A, et al. Echonet-dynamic: a large new cardiac motion video data  
409 resource for medical machine learning. In: NeurIPS ML4H Workshop: Vancouver, BC, Canada.  
410 2019.
- 411 40. Feichtenhofer C. X3d: Expanding architectures for efficient video recognition. In: Proceedings of  
412 the IEEE/CVF conference on computer vision and pattern recognition. 2020. p. 203–13.
- 413 41. Bhardwaj S, Srinivasan M, Khapra MM. Efficient video classification using fewer frames. In:  
414 Proceedings of the IEEE/CVF Conference on Computer Vision and Pattern Recognition. 2019. p.  
415 354–63.
- 416
